# Supplementary material for: Medial prefrontal neuroplasticity during extended-release naltrexone treatment of opioid use disorder – a longitudinal structural magnetic resonance imaging study
Source: PubMed Central journal article supplement — Transl Psychiatry. 2024 Sep 5;14:360. doi: 10.1038/s41398-024-03061-0 (PMC11377591; doi:10.1038/s41398-024-03061-0), 2024-09-05
Supplement: 41398_2024_3061_MOESM1_ESM.pdf [file 41398_2024_3061_MOESM1_ESM.pdf]

# 1 Medial prefrontal neuroplasticity during extended-release naltrexone treatment of opioid use 2 disorder – a longitudinal structural magnetic resonance imaging study

3  
4 Zhenhao Shi<sup>1</sup>, Xinyi Li<sup>1</sup>, Dustin R. Todaro<sup>1</sup>, Wen Cao<sup>1</sup>, Kevin G. Lynch<sup>1</sup>, John A. Detre<sup>2</sup>, James Loughhead<sup>1</sup>,  
5 Daniel D. Langleben<sup>1\*</sup>, Corinde E. Wiers<sup>1\*</sup>

6  
7 <sup>1</sup> Department of Psychiatry, University of Pennsylvania Perelman School of Medicine, 3535 Market St,  
8 Philadelphia, PA 19104, USA; <sup>2</sup> Department of Neurology, University of Pennsylvania Perelman School of  
9 Medicine, 3400 Spruce St, Philadelphia, PA 19104, USA. \* Equal contribution

## 10 11 12 SUPPLEMENTARY INFORMATION

### 13 14 Table of Contents

|    |                                                                                                    |    |
|----|----------------------------------------------------------------------------------------------------|----|
| 15 | 1. Cortical thickness change from pre-treatment to on-treatment – whole-brain results.....         | s1 |
| 16 | 2. Effect of the duration of abstinence and imaging data quality .....                             | s1 |
| 17 | 3. Cortical thickness at post-treatment.....                                                       | s2 |
| 18 | 4. Cortical thickness difference between OUD and non-OUD individuals – whole-brain results .....   | s3 |
| 19 | 5. Association between changes in cortical thickness and opioid craving – whole-brain results..... | s3 |
| 20 | 6. Confirmatory analysis with varying spatial smoothing parameters.....                            | s3 |
| 21 | 7. Confirmatory analysis with voxel-based morphometry.....                                         | s4 |
| 22 | 8. References.....                                                                                 | s4 |
| 23 | Tables.....                                                                                        | s6 |
| 24 | Figures.....                                                                                       | s9 |

### 25 26 1. Cortical thickness change from pre-treatment to on-treatment – whole-brain results

27 The brain regions that showed significant difference in cortical thickness between the pre-treatment and on-  
28 treatment sessions in the OUD participants are summarized in **Table S1**.

### 29 30 2. Effect of the duration of abstinence and imaging data quality

31 Linear regression analyses showed no significant effect of duration of abstinence on mPFC/aCC cortical  
32 thickness of the OUD participants at pre-treatment ( $F(1,45)=0.01$ ,  $p=0.93$ ), on-treatment ( $F(1,45)=0.22$ ,  $p=0.64$ ),  
33 or its change from pre-treatment to on-treatment ( $F(1,45)=1.15$ ,  $p=0.29$ ). Similarly, there was no significant effect  
34 of duration of abstinence on opioid craving at pre-treatment ( $F(1,45)=1.21$ ,  $p=0.27$ ), on-treatment ( $F(1,45)=0.09$ ,  
35  $p=0.77$ ), or its change from pre-treatment to on-treatment ( $F(1,45)=0.39$ ,  $p=0.54$ ).

36 We used MRIQC (1) to compute the following of imaging data quality metrics: contrast-to-noise ratio (CNR)  
37 that measures the separation of different brain tissues (2); signal-to-noise ratio (SNR) for foreground segmentation  
38 (3); median of intensity non-uniformity (INU) that reflects radiofrequency field inhomogeneity (4); coefficient of  
39 joint variation (CJV) that measures the impact of head motion and intensity non-uniformity (5); entropy focus  
40 criterion (EFC) for motion artifacts (6); residual partial volume effect (rPVE) of gray matter tissue; Mortamet's  
41 quality indices (QI1, QI2) of artifact effect on voxels and noise intensity distribution (7); foreground-background  
42 energy ratio (FBER) that measures the relative variance of brain voxels (8); white-matter to maximum intensity

1 ratio (WM2MAX) that reflects the effects of hyper-intensity blood vessels and fat tissues; fractional volume of  
2 gray matter (ICV) relative to total intracranial volume; and full width at half maximum (FWHM) that measures  
3 spatial smoothness (9). Visual inspection was additionally conducted on individual raw images and cortical  
4 thickness maps to ensure successful execution of the preprocessing pipeline. Of the 49 individuals who completed  
5 the pre-treatment and on-treatment MRI assessments, two were excluded due to poor data quality, leaving 47  
6 participants in the final analyses. The pre-treatment images had lower rPVE ( $p=0.024$ ), higher ICV ( $p=0.022$ ),  
7 and marginally higher INU ( $p=0.089$ ) values compared to the on-treatment images. Using the `lme4` and  
8 `lmerTest` packages in R, we fitted a linear mixed-effects (LME) model using restricted maximum likelihood  
9 estimation to compare mPFC/aCC thickness between pre-treatment and on-treatment while controlling for the  
10 above three quality metrics. Statistical significance was evaluated using the Satterthwaite approximation for the  
11 degrees of freedom (10). We found that the reduction in mPFC/aCC thickness remained significant (2.91 vs. 2.77,  
12 difference=0.14, 95% CI=[0.09,0.20],  $F(1,51.94)=26.02$ ,  $p<0.001$ ). The pre-treatment and on-treatment images  
13 did not differ on other imaging data quality metrics ( $ps>0.11$ ).

14

### 15 3. Cortical thickness at post-treatment

16 Following an average of 44.00 (SD=17.06) days after the third and last XR-NTX injection, a subsample of  
17 25 OUD participants completed the post-treatment session (see **Figure S1**). Fisher's exact tests and independent  
18 t-tests showed that the demographic and clinical characteristics did not differ between the participants who  
19 completed the post-treatment session ( $N=25$ ) and those who did not ( $N=22$ ) ( $ps>0.11$ ) (see **Table S2**).

20 We investigated whether the changes in cortical thickness observed from pre-treatment to on-treatment  
21 persisted during the post-treatment session in the OUD patients. We extracted the cortical thickness values from  
22 the mPFC/aCC ROI, which was defined based on the whole-brain paired t-test of pre-treatment vs. on-treatment.  
23 The values obtained from all available participants at the each timepoint were included in an LME model with  
24 random intercepts. Post-hoc analyses were performed with the `emmeans` package while correcting for multiple  
25 comparisons using the Holm method (11). Given that the pre-treatment vs. on-treatment contrast was already  
26 examined in the whole-brain analysis, here we only examined the pre-treatment vs. post-treatment and on-  
27 treatment vs. post-treatment contrasts to avoid circular inference. We found a main effect of session  
28 ( $F(2,71.07)=13.88$ ,  $p<0.001$ ) such that post-treatment mPFC/aCC cortical thickness was significantly lower than  
29 pre-treatment (2.79 vs. 2.92, difference=-0.13, 95% CI=[-0.23,-0.04], corrected  $p=0.005$ ) and comparable to on-  
30 treatment (2.79 vs. 2.75, difference=0.04, 95% CI=[-0.06,0.13], corrected  $p=0.39$ ) (see **Figure S2**).

31 Two additional LME analyses were performed to assess the impact of missing data on the above findings.  
32 First, we repeated the LME analysis while restricting the sample to the OUD individuals who completed all three  
33 MRI sessions (i.e., listwise deletion,  $N=25$  for all timepoints). Similar to the unrestricted analysis above, there  
34 was a main effect of session ( $F(2,48)=3.93$ ,  $p=0.026$ ) such that post-treatment mPFC/aCC cortical thickness was  
35 marginally significantly lower than pre-treatment (2.77 vs. 2.88, difference=-0.11, 95% CI=[-0.22,0.00],  
36 corrected  $p=0.060$ ) and comparable to on-treatment (2.77 vs. 2.75, difference=0.02, 95% CI=[-0.10,0.13],  
37 corrected  $p=0.73$ ). Second, we performed inverse probability weighted LME analysis, where the probability ( $p$ )  
38 of missing post-treatment data was calculated using a logistic regression model that included all baseline  
39 characteristics as predictors. For each OUD participant, the weight was calculated as  $A/p+(1-A)/(1-p)$ , where  $A=1$   
40 if post-treatment data were missing and  $A=0$  otherwise. The weights were subsequently truncated to the middle  
41 95% of the distribution to minimize the impact of extreme weights (12). Similar to the unweighted analysis above,  
42 there was a main effect of session ( $F(2,70.80)=14.78$ ,  $p<0.001$ ) such that post-treatment mPFC/aCC cortical  
43 thickness was significantly lower than pre-treatment (2.75 vs. 2.96, difference=-0.20, 95% CI=[-0.29,-0.10],  
44 corrected  $p<0.001$ ) and comparable to on-treatment (2.75 vs. 2.75, difference=-0.01, 95% CI=[-0.10,0.09],  
45 corrected  $p=0.88$ ).

46 We also conducted a comparison between the non-OUD group and the OUD group at the post-treatment  
47 session. Two-sample t-test showed that the mPFC/aCC cortical thickness of the non-OUD group  
48 (mean±SD=2.96±0.34) was higher than the OUD group at post-treatment ( $t(40.1)=2.06$ ,  $p=0.046$ ) (see **Figure S2**).  
49 Linear regression that controlled for race and stimulant use disorder yielded similar results (coefficient=0.29,  
50 SE=0.10,  $t(74)=2.87$ ,  $p=0.005$ ).

1  
2  
3  
4  
5  
6  
7  
8  
9  
10  
11  
12  
13  
14  
15  
16  
17  
18  
19  
20  
21  
22  
23  
24  
25  
26  
27  
28  
29  
30  
31  
32  
33  
34  
35  
36  
37  
38  
39  
40  
41  
42  
43  
44  
45  
46  
47

#### 4. Cortical thickness difference between OUD and non-OUD individuals – whole-brain results

The brain regions that showed significant difference in cortical thickness between the non-OUD group and the OUD group at pre-treatment are shown in **Figure S3a** and summarized in **Table S3**. The brain regions that showed significant difference in cortical thickness between the non-OUD group and the OUD group at on-treatment are shown in **Figure S3b** and summarized in **Table S4**.

#### 5. Association between changes in cortical thickness and opioid craving – whole-brain results

The brain regions that showed a significant correlation between the change in cortical thickness and the change in opioid craving from pre-treatment and on-treatment are summarized in **Table S5**.

#### 6. Confirmatory analysis with varying spatial smoothing parameters

*Un-smoothed:* There was a significant reduction in mPFC/aCC cortical thickness from pre-treatment to on-treatment among the OUD individuals ( $k=170$ ,  $Z=4.71$ ,  $x/y/z=5/48/-2$ ). There was no increase in cortical thickness from pre-treatment to on-treatment. Cortical thickness of the mPFC/aCC ROI (defined using un-smoothed data) at post-treatment was lower than pre-treatment (main effect,  $F(2,71.07)=17.10$ ,  $p<0.001$ ; 3.48 vs. 3.73, difference= $-0.25$ , 95% CI= $[-0.41,-0.09]$ , corrected  $p=0.002$ ) and comparable to on-treatment (3.48 vs. 3.41, difference= $0.07$ , 95% CI= $[-0.10,0.23]$ , corrected  $p=0.35$ ). Compared to the non-OUD group (mean $\pm$ SD= $3.72\pm0.61$ ), the OUD group had comparable mPFC/aCC cortical thickness at pre-treatment ( $3.73\pm0.75$ ,  $t(88.2)=-0.09$ ,  $p=0.93$ ) but significantly lower thickness at on-treatment ( $3.41\pm0.67$ ,  $t(94.0)=2.39$ ,  $p=0.019$ ). There was a positive correlation between the reduction in opioid craving and the reduction in mPFC/aCC thickness from pre-treatment to on-treatment in the OUD group ( $r=0.34$ ,  $p=0.019$ ). Whole-brain regression analysis showed that the change in opioid craving was positively associated with the change in cortical thickness of the mPFC ( $k=60$ ,  $Z=4.71$ ,  $x/y/z=11/14/-15$ ;  $k=25$ ,  $Z=4.60$ ,  $x/y/z=14/49/3$ ), right amygdala ( $k=55$ ,  $Z=5.02$ ,  $x/y/z=24/3/-14$ ), left insula ( $k=91$ ,  $Z=4.53$ ,  $x/y/z=-38/-9/11$ ;  $k=777$ ,  $Z=4.43$ ,  $x/y/z=-35/-15/20$ ;  $k=174$ ,  $Z=4.39$ ,  $x/y/z=-42/-6/-6$ ), right angular gyrus ( $k=121$ ,  $Z=4.29$ ,  $x/y/z=51/-56/17$ ), and right middle temporal gyrus ( $k=47$ ,  $Z=4.03$ ,  $x/y/z=49/-57/7$ ). There was no significant negative correlation.

*Smoothed with 12-mm FWHM:* There was a significant reduction in mPFC/aCC cortical thickness from pre-treatment to on-treatment among the OUD individuals ( $k=3521$ ,  $Z=4.38$ ,  $x/y/z=5/51/-2$ ;  $k=568$ ,  $Z=3.64$ ,  $x/y/z=-2/32/-18$ ;  $k=664$ ,  $Z=3.58$ ,  $x/y/z=-5/13/27$ ). There was no increase in cortical thickness from pre-treatment to on-treatment. Cortical thickness of the mPFC/aCC ROI (defined using data smoothed with 12-mm FWHM) at post-treatment was lower than pre-treatment (main effect,  $F(2,71.15)=8.35$ ,  $p<0.001$ ; 2.14 vs. 2.23, difference= $-0.09$ , 95% CI= $[-0.16,-0.02]$ , corrected  $p=0.012$ ) and comparable to on-treatment (2.14 vs. 2.14, difference= $-0.00$ , 95% CI= $[-0.07,0.07]$ , corrected  $p=0.89$ ). Compared to the non-OUD group (2.30 $\pm$ 0.27), the OUD group had comparable mPFC/aCC cortical thickness at pre-treatment (2.23 $\pm$ 0.27,  $t(98.22)=1.32$ ,  $p=0.19$ ) but significantly lower thickness at on-treatment (2.14 $\pm$ 0.26,  $t(99.83)=3.09$ ,  $p=0.003$ ). There was a significant positive correlation between the reduction in opioid craving and the reduction in mPFC/aCC thickness from pre-treatment to on-treatment in the OUD group ( $r=0.44$ ,  $p=0.002$ ). Whole-brain regression analysis showed that the change in opioid craving was positively associated with the change in cortical thickness of the mPFC ( $k=84962$ ,  $Z=4.20$ ,  $x/y/z=-4/36/31$ ) extending to the left parietal cortex ( $Z=3.90$ ,  $x/y/z=-46/-23/37$ ), left temporal cortex ( $Z=3.88$ ,  $x/y/z=-43/-6/-10$ ), left prefrontal cortex ( $Z=3.84$ ,  $x/y/z=-41/16/31$ ), aCC ( $Z=3.72$ ,  $x/y/z=-5/34/4$ ), and left insula ( $Z=2.47$ ,  $x/y/z=-38/15/-14$ ), the right prefrontal cortex ( $k=34284$ ,  $Z=4.19$ ,  $x/y/z=46/7/15$ ) extending to the right insula ( $Z=3.40$ ,  $x/y/z=34/0/15$ ), the right parietal cortex ( $k=2948$ ,  $Z=3.91$ ,  $x/y/z=41/-41/50$ ), the left occipital cortex, ( $k=6538$ ,  $Z=3.64$ ,  $x/y/z=-15/-77/28$ ), the precuneus/cuneus ( $k=1392$ ,  $Z=3.40$ ,  $x/y/z=20/-70/39$ ), the right temporoparietal junction ( $k=9701$ ,  $Z=3.39$ ,  $x/y/z=47/-47/26$ ), the supplementary motor area ( $k=1443$ ,  $Z=2.99$ ,  $x/y/z=12/-1/47$ ), the right temporal cortex ( $k=809$ ,  $Z=2.95$ ,  $x/y/z=39/-33/13$ ), and the right occipital cortex ( $k=562$ ,  $Z=2.91$ ,  $x/y/z=23/-94/6$ ). There was no significant negative correlation.

1

## 2 7. Confirmatory analysis with voxel-based morphometry

3 We performed voxel-based morphometry (VBM) analysis using the CAT12 longitudinal pipeline (13). Gray  
4 matter volume images were spatially smoothed with 4-mm FWHM. Age, sex, and total intracranial volume (TIV)  
5 were treated as covariates and were controlled for.

6 There was a significant reduction in gray matter volume from pre-treatment to on-treatment among the OUD  
7 individuals in a number of brain regions including the cuneus/precuneus ( $k=10167$ ,  $Z=4.63$ ,  $x/y/z=7.5/-70.5/25.5$ )  
8 extending to the mPFC/aCC ( $Z=4.51$ ,  $x/y/z=-3/48/31.5$ ;  $Z=3.82$ ,  $x/y/z=4.5/42/12$ ), the right temporal cortex  
9 ( $k=10123$ ,  $Z=4.81$ ,  $x/y/z=69/-15/-10.5$ ) extending to the frontal ( $Z=4.69$ ,  $x/y/z=30/46.5/36$ ), occipital ( $Z=4.40$ ,  
10  $x/y/z=55.5/-69/-1.5$ ), parietal ( $Z=4.02$ ,  $x/y/z=63/-22.5/22.5$ ), insular cortices ( $Z=3.86$ ,  $x/y/z=33/16.5/9$ ) and  
11 cerebellum ( $Z=3.51$ ,  $x/y/z=10.5/-90/-30$ ), the left temporal ( $k=242$ ,  $Z=4.49$ ,  $x/y/z=-51/-7.5/-16.5$ ;  $k=41$ ,  $Z=2.92$ ,  
12  $x/y/z=-66/-33/-1.5$ ) and occipital cortices ( $k=75$ ,  $Z=4.09$ ,  $x/y/z=-34.5/-79.5/-18$ ;  $k=1166$ ,  $Z=4.08$ ,  $x/y/z=-54/-$   
13  $72/9$ ), the right prefrontal ( $k=39$ ,  $Z=3.01$ ,  $x/y/z=39/12/34.5$ ) and temporal cortices ( $k=57$ ,  $Z=3.01$ ,  $x/y/z=66/-42/-$   
14  $16.5$ ), the cerebellum ( $k=1032$ ,  $Z=4.07$ ,  $x/y/z=-3/-67.5/-48$ ;  $k=142$ ,  $Z=3.92$ ,  $x/y/z=37.5/-42/-37.5$ ;  $k=22$ ,  $Z=3.59$ ,  
15  $x/y/z=48/-67.5/-43.5$ ), the left temporoparietal junction ( $k=515$ ,  $Z=3.77$ ,  $x/y/z=-51/-55.5/16.5$ ), the right  
16 fusiform gyrus ( $k=89$ ,  $Z=3.70$ ,  $x/y/z=22.5/-30/-22.5$ ), the precuneus ( $k=35$ ,  $Z=2.74$ ,  $x/y/z=3/-64.5/39$ ), and the  
17 right postcentral gyrus ( $k=42$ ,  $Z=2.74$ ,  $x/y/z=55.5/-19.5/40.5$ ). There was no significant increase in gray matter  
18 volume. Gray matter volume of the mPFC/aCC ROI (defined by the Neuromorphometrics atlas) at post-treatment  
19 was lower than pre-treatment at trend level (main effect,  $F(2,70.26)=4.40$ ,  $p=0.016$ ;  $0.56$  vs.  $0.57$ , difference= $-$   
20  $0.005$ , 95% CI= $[-0.011,0.001]$ , corrected  $p=0.10$ ) and comparable to on-treatment ( $0.56$  vs.  $0.56$ ,  
21 difference= $0.001$ , 95% CI= $[-0.005,0.006]$ , corrected  $p=0.85$ ). The OUD group had lower mPFC/aCC gray matter  
22 volume than the non-OUD group at pre-treatment ( $F(1,98)=8.01$ ,  $p=0.006$ ) and on-treatment ( $F(1,98)=11.94$ ,  
23  $p<0.001$ ). There was a positive correlation between the reduction in opioid craving and the reduction in  
24 mPFC/aCC gray matter volume from pre-treatment to on-treatment in the OUD group (adjusted for age, sex, and  
25 TIV,  $r=0.29$ ,  $p=0.048$ ). Whole-brain regression analysis did not show any significant association between the  
26 change in opioid craving and the change in gray matter volume at FDR-corrected  $p<0.05$ . Using an exploratory  
27 threshold of uncorrected voxel-level  $p<0.005$  and cluster extent  $>600$  mm<sup>3</sup> (14), we found positive associations at  
28 the mPFC/aCC ( $k=339$ ,  $Z=3.57$ ,  $x/y/z=3/21/21$ ), left insula ( $k=446$ ,  $Z=3.86$ ,  $x/y/z=-40.5/1.5/-6$ ), right insula  
29 ( $k=305$ ,  $Z=3.99$ ,  $x/y/z=46.5/3/-13.5$ ;  $k=179$ ,  $Z=3.68$ ,  $x/y/z=36/22.5/1.5$ ), and right occipital cortex/precuneus  
30 ( $k=803$ ,  $Z=4.02$ ,  $x/y/z=9/-75/0$ ), and negative associations at the right cerebellum ( $k=414$ ,  $Z=4.06$ ,  $x/y/z=33/-$   
31  $67.5/-40.5$ ).

32 Taken together, the VBM analysis replicated the cortical thickness results and revealed mPFC/aCC gray  
33 matter volume reduction from pre-treatment to on-treatment that was associated with the reduction in opioid  
34 craving. The VBM analysis additionally revealed reduced gray matter volume in the bilateral prefrontal, parietal,  
35 and temporal cortices. Prior studies show that gray matter volume is determined by not only cortical thickness but  
36 also other morphological characteristics such as cortical folding/gyrification and cortical surface (15, 16).  
37 Therefore, it is possible that the gray matter volume reduction outside the mPFC/aCC was mainly driven by those  
38 other, non-thickness variables.

39

## 40 8. References

- 41 1. Esteban O, Birman D, Schaer M, Koyejo OO, Poldrack RA, Gorgolewski KJ. MRIQC: advancing the  
42 automatic prediction of image quality in MRI from unseen sites. *PLoS One*. 2017;12(9):e0184661.
- 43 2. Magnotta VA, Friedman L, First B. Measurement of signal-to-noise and contrast-to-noise in the fBIRN  
44 Multicenter Imaging Study. *J Digit Imaging*. 2006;19(2):140-7.
- 45 3. Dietrich O, Raya JG, Reeder SB, Reiser MF, Schoenberg SO. Measurement of signal-to-noise ratios in MR  
46 images: Influence of multichannel coils, parallel imaging, and reconstruction filters. *J Magn Reson Imaging*.  
47 2007;26(2):375-85.

- 1 4. Tustison NJ, Avants BB, Cook PA, Zheng Y, Egan A, Yushkevich PA, et al. N4ITK: improved N3 bias  
2 correction. *IEEE Trans Med Imaging*. 2010;29(6):1310-20.
- 3 5. Ganzetti M, Wenderoth N, Mantini D. Intensity inhomogeneity correction of structural MR images: a data-  
4 driven approach to define input algorithm parameters. *Front Neuroinform*. 2016;10:10.
- 5 6. Atkinson D, Hill DLG, Stoye PNR, Summers PE, Keevil SF. Automatic correction of motion artifacts in  
6 magnetic resonance images using an entropy focus criterion. *IEEE Trans Med Imaging*. 1997;16(6):903-10.
- 7 7. Mortamet B, Bernstein MA, Jack Jr CR, Gunter JL, Ward C, Britson PJ, et al. Automatic quality assessment  
8 in structural brain magnetic resonance imaging. *Magn Reson Med*. 2009;62(2):365-72.
- 9 8. Shehzad Z, Giavasis S, Li Q, Benhajali Y, Yan C, Yang Z, et al. The Preprocessed Connectomes Project  
10 Quality Assessment Protocol - a resource for measuring the quality of MRI data. *Frontiers in Neuroscience*  
11 *Conference Abstract: Neuroinformatics 2015*. 2015.
- 12 9. Forman SD, Cohen JD, Fitzgerald M, Eddy WF, Mintun MA, Noll DC. Improved assessment of significant  
13 activation in functional magnetic resonance imaging (fMRI): use of a cluster-size threshold. *Magn Reson*  
14 *Med*. 1995;33(5):636-47.
- 15 10. Luke SG. Evaluating significance in linear mixed-effects models in R. *Behav Res Methods*.  
16 2017;49(4):1494-502.
- 17 11. Holm S. A simple sequentially rejective multiple test procedure. *Scandinavian Journal of Statistics*.  
18 1979:65-70.
- 19 12. Cole SR, Hernán MA. Constructing inverse probability weights for marginal structural models. *Am J*  
20 *Epidemiol*. 2008;168(6):656-64.
- 21 13. Gaser C, Dahnke R, Thompson PM, Kurth F, Luders E, Alzheimer's Disease Neuroimaging Initiative. CAT  
22 – a computational anatomy toolbox for the analysis of structural MRI data. *bioRxiv*.  
23 2023:2022.06.11.495736.
- 24 14. Lieberman MD, Cunningham WA. Type I and Type II error concerns in fMRI research: re-balancing the  
25 scale. *Soc Cogn Affect Neurosci*. 2009;4(4):423-8.
- 26 15. Hutton C, Draganski B, Ashburner J, Weiskopf N. A comparison between voxel-based cortical thickness  
27 and voxel-based morphometry in normal aging. *Neuroimage*. 2009;48(2):371-80.
- 28 16. Palaniyappan L, Liddle PF. Differential effects of surface area, gyrification and cortical thickness on voxel  
29 based morphometric deficits in schizophrenia. *Neuroimage*. 2012;60(1):693-9.

30  
31

1 **TABLES**

2

3 **Table S1.** Brain regions showing a significant difference in cortical thickness between the pre-treatment and on-treatment  
4 sessions in the OUD group (whole-brain corrected  $p < 0.025$ ).

| Region                                                | Cluster extent (mm <sup>3</sup> ) | Z    | MNI coordinates |
|-------------------------------------------------------|-----------------------------------|------|-----------------|
| <b><i>ODD pre-treatment &gt; ODD on-treatment</i></b> |                                   |      |                 |
| Left middle frontal gyrus                             | 88915                             | 6.22 | -47, 18, 43     |
| Left postcentral gyrus                                |                                   | 5.99 | -53, -22, 55    |
| Left inferior frontal gyrus                           |                                   | 5.93 | -53, 27, 20     |
| Left superior temporal gyrus                          |                                   | 5.61 | -62, -2, -1     |
| Right postcentral gyrus                               | 94343                             | 6.03 | 41, -30, 64     |
| Right middle frontal gyrus                            |                                   | 5.85 | 37, 27, 42      |
| Right superior frontal gyrus                          |                                   | 5.72 | 21, 13, 65      |
| Right precentral gyrus                                |                                   | 5.58 | 37, -15, 66     |
| Right inferior frontal gyrus                          |                                   | 5.31 | 58, 10, 27      |
| Ventromedial prefrontal cortex                        | 3129                              | 5.44 | -4, 12, -7      |
| Anterior cingulate cortex                             |                                   | 3.86 | -1, 25, -7      |
| Mid-cingulate cortex                                  |                                   | 3.85 | -1, 11, 32      |
| Left postcentral gyrus                                | 3890                              | 5.24 | -18, -44, 71    |
| Precuneus                                             |                                   | 4.42 | -6, -42, 74     |
| Left superior parietal lobule                         |                                   | 4.03 | -15, -76, 49    |
| Cuneus                                                | 503                               | 4.42 | -7, -83, 39     |
| Right orbitofrontal cortex                            | 556                               | 4.02 | 21, 27, -13     |
| Mid-cingulate cortex                                  | 623                               | 3.42 | 3, -3, 30       |
| Right anterior insula                                 | 499                               | 3.23 | 29, 23, 6       |
| Left superior temporal gyrus                          | 95                                | 3.01 | -52, -39, 6     |
| Right parahippocampal gyrus                           | 55                                | 2.92 | 23, -20, -24    |
| Left orbitofrontal cortex                             | 57                                | 2.85 | -18, 6, -18     |
| Left middle temporal gyrus                            | 22                                | 2.77 | -46, -35, -4    |
| Left postcentral gyrus                                | 20                                | 2.77 | -49, -22, 23    |
| Left anterior insula                                  | 51                                | 2.51 | -32, 5, 6       |
| Dorsomedial prefrontal gyrus                          | 23                                | 2.45 | -1, 48, 21      |
| Left anterior insula                                  | 23                                | 2.44 | -30, 26, 11     |
| Supplementary motor area                              | 23                                | 2.44 | -1, -4, 47      |
| <b><i>ODD pre-treatment &lt; ODD on-treatment</i></b> |                                   |      |                 |
| (none)                                                |                                   |      |                 |

**Abbreviation:** MNI, Montreal Neurological Institute.

5

6 **Table S2.** Comparison of baseline characteristics between the OUD participants who completed the post-treatment session  
7 (i.e., completers) and those who did not (i.e., non-completers).

| Variable                             | Completer          | Non-completer      | p-value <sup>1</sup> |
|--------------------------------------|--------------------|--------------------|----------------------|
| N                                    | 25                 | 22                 | -                    |
| Sex                                  | 15 male, 10 female | 11 male, 11 female | 0.56                 |
| Age (years)                          | 30.92±9.28         | 26.91±7.69         | 0.11                 |
| Years of education                   | 14.12±2.09         | 13.36±2.13         | 0.23                 |
| Race                                 | 23 White, 2 AA     | 21 White, 1 Asian  | 0.35                 |
| Ethnicity                            | 3 Hispanic         | 0 Hispanic         | 0.24                 |
| Years of opioid use                  | 5.72±4.58          | 5.95±7.31          | 0.90                 |
| Alcohol use disorder                 | 3                  | 6                  | 0.27                 |
| Stimulant use disorder               | 6                  | 7                  | 0.75                 |
| Cannabis use disorder                | 8                  | 7                  | >0.99                |
| Prescription opioid use              | 16                 | 16                 | 0.55                 |
| Heroin use                           | 18                 | 15                 | >0.99                |
| Number of days since last opioid use | 17.52±14.46        | 19.05±20.97        | 0.77                 |
| Number of cigarettes per day         | 12.47±10.37        | 14.10±6.02         | 0.51                 |
| UDS positive for stimulant           | 2                  | 3                  | 0.65                 |
| UDS positive for cannabis            | 8                  | 9                  | 0.56                 |
| Opioid craving (0–9)                 | 3.12±2.70          | 4.18±3.06          | 0.22                 |

**Abbreviation:** OUD, opioid use disorder. AA, African American; UDS, urine drug screen.

<sup>1</sup> P-values were obtained from independent t-tests for numeric variables and Fisher's exact tests for categorical variables.

8

1 **Table S3.** Brain regions showing a significant difference in cortical thickness between the non-ODU group and the OUD  
 2 group at pre-treatment (whole-brain corrected  $p < 0.025$ ).

| Region                                                                               | Cluster extent (mm <sup>3</sup> ) | Z    | MNI coordinates |
|--------------------------------------------------------------------------------------|-----------------------------------|------|-----------------|
| <b><i>non-ODU &gt; OUD pre-treatment</i></b>                                         |                                   |      |                 |
| Left postcentral gyrus                                                               | 119305                            | 6.42 | -48, -23, 58    |
| Left orbitofrontal gyrus                                                             |                                   | 6.01 | -32, 62, -10    |
| Left inferior frontal gyrus                                                          |                                   | 5.88 | -54, 25, 18     |
| Left middle frontal gyrus                                                            |                                   | 5.85 | -46, 18, 44     |
| Left superior temporal gyrus                                                         |                                   | 5.47 | -62, -1, -1     |
| Right middle frontal gyrus                                                           | 104874                            | 5.92 | 37, 27, 42      |
| Right superior frontal gyrus                                                         |                                   | 5.56 | 18, -6, 73      |
| Right postcentral gyrus                                                              |                                   | 5.21 | 56, -12, 49     |
| Right precentral gyrus                                                               |                                   | 5.19 | 37, -16, 67     |
| Right inferior frontal gyrus                                                         |                                   | 5.10 | 58, 10, 28      |
| Right orbitofrontal gyrus                                                            | 1113                              | 4.17 | 21, 27, -13     |
| Right orbitofrontal gyrus/anterior insula                                            |                                   | 3.08 | 19, 18, -24     |
| Mid-cingulate cortex                                                                 | 610                               | 3.41 | 3, -21, 46      |
| Precuneus                                                                            |                                   | 2.95 | 7, -38, 52      |
| Posterior cingulate cortex                                                           |                                   | 2.23 | 1, -34, 45      |
| Left inferior temporal gyrus                                                         | 403                               | 3.33 | -48, -19, -29   |
| Left inferior temporal gyrus                                                         | 55                                | 2.91 | -47, -8, -31    |
| Mid-cingulate cortex                                                                 | 29                                | 2.69 | -1, -28, 47     |
| Mid-cingulate cortex                                                                 | 34                                | 2.45 | -5, -24, 30     |
| <b><i>non-ODU &lt; OUD pre-treatment</i></b>                                         |                                   |      |                 |
| (none)                                                                               |                                   |      |                 |
| <b>Abbreviation:</b> OUD, opioid use disorder. MNI, Montreal Neurological Institute. |                                   |      |                 |

3  
 4 **Table S4.** Brain regions showing a significant difference in cortical thickness between the non-ODU group and the OUD  
 5 group at on-treatment (whole-brain corrected  $p < 0.025$ ).

| Region                                                                               | Cluster extent (mm <sup>3</sup> ) | Z    | MNI coordinates |
|--------------------------------------------------------------------------------------|-----------------------------------|------|-----------------|
| <b><i>non-ODU &lt; OUD on-treatment</i></b>                                          |                                   |      |                 |
| Medial prefrontal cortex                                                             | 2587                              | 4.87 | 5, 48, -3       |
| Anterior cingulate cortex                                                            |                                   | 4.32 | -3, 51, 2       |
| Anterior/mid-cingulate cortex                                                        | 377                               | 3.86 | 2, 4, 35        |
| Anterior/mid-cingulate cortex                                                        | 107                               | 3.60 | -6, 3, 42       |
| Anterior cingulate cortex                                                            | 276                               | 3.55 | -2, 33, 17      |
| Medial prefrontal cortex                                                             | 44                                | 3.47 | -4, 42, 28      |
| <b><i>non-ODU &lt; OUD on-treatment</i></b>                                          |                                   |      |                 |
| (none)                                                                               |                                   |      |                 |
| <b>Abbreviation:</b> OUD, opioid use disorder. MNI, Montreal Neurological Institute. |                                   |      |                 |

6  
 7

1 **Table S5.** Brain regions showing a significant correlation between the change in cortical thickness and the change in opioid  
 2 craving from pre-treatment and on-treatment in the OUD group (whole-brain corrected  $p < 0.05$ ).

| Region                                                                               | Cluster extent (mm <sup>3</sup> ) | Z    | MNI coordinates |
|--------------------------------------------------------------------------------------|-----------------------------------|------|-----------------|
| <b>Positive correlation with the change in craving</b>                               |                                   |      |                 |
| Right inferior frontal gyrus                                                         | 952                               | 5.07 | 42, 32, 2       |
| Right anterior insula                                                                |                                   | 3.72 | 38, 19, -13     |
| Right orbitofrontal cortex                                                           | 274                               | 4.65 | 23, 5, -14      |
| Medial prefrontal cortex                                                             | 3751                              | 4.54 | -11, 53, -4     |
| Anterior cingulate cortex                                                            |                                   | 4.05 | -2, 38, 19      |
| Left posterior insula                                                                | 6133                              | 4.28 | -41, -6, -7     |
| Left superior temporal gyrus                                                         |                                   | 4.13 | -66, -30, 1     |
| Left anterior insula                                                                 |                                   | 3.97 | -44, 2, 4       |
| Left inferior frontal gyrus                                                          |                                   | 3.94 | -39, 8, 9       |
| Left postcentral gyrus                                                               | 42                                | 4.22 | -43, -24, 38    |
| Left supramarginal gyrus                                                             | 453                               | 4.14 | -52, -29, 45    |
| Medial orbitofrontal gyrus                                                           | 89                                | 4.09 | 13, 14, -17     |
| Right posterior insula                                                               | 1246                              | 4.04 | 42, -8, -6      |
| Medial orbitofrontal gyrus                                                           | 797                               | 4.04 | -19, 10, -5     |
| Left postcentral gyrus                                                               | 310                               | 4.04 | -62, -19, 39    |
| Right inferior frontal gyrus                                                         | 370                               | 4.02 | 36, 16, 32      |
| Left precentral gyrus                                                                | 92                                | 3.92 | -33, -17, 42    |
| Right inferior frontal gyrus                                                         | 345                               | 3.72 | 52, 12, 12      |
| Left supramarginal gyrus                                                             | 397                               | 3.68 | -55, -35, 19    |
| Medial prefrontal cortex                                                             | 222                               | 3.68 | -9, 55, 17      |
| Right anterior insula                                                                | 291                               | 3.64 | 31, 21, 12      |
| Right anterior insula                                                                | 41                                | 3.55 | 46, 17, -2      |
| Left middle frontal gyrus                                                            | 146                               | 3.47 | -27, 10, 58     |
| Left precentral gyrus                                                                | 80                                | 3.46 | -40, -5, 45     |
| Left supramarginal gyrus                                                             | 26                                | 3.46 | -65, -41, 22    |
| Left middle frontal gyrus                                                            | 74                                | 3.30 | -38, 1, 51      |
| Right inferior frontal gyrus                                                         | 51                                | 3.28 | 60, 13, 15      |
| Left precentral gyrus                                                                | 24                                | 3.14 | -43, 1, 37      |
| <b>Negative correlation with the change in craving</b>                               |                                   |      |                 |
| (none)                                                                               |                                   |      |                 |
| <b>Abbreviation:</b> OUD, opioid use disorder. MNI, Montreal Neurological Institute. |                                   |      |                 |

3

4

5



1 **FIGURES**

2  
3

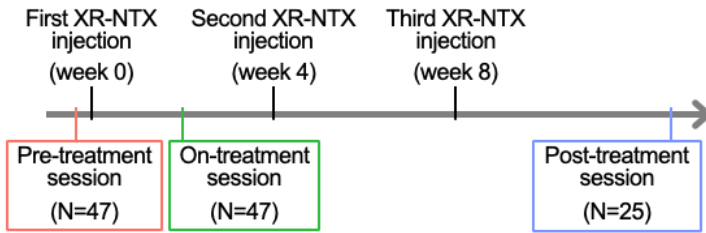

4 **Figure S1.** Study procedure and sample size of the OUD group at each study session. **Abbreviation:** OUD, opioid use  
5 disorder; XR-NTX, extended-release naltrexone.  
6

7  
8

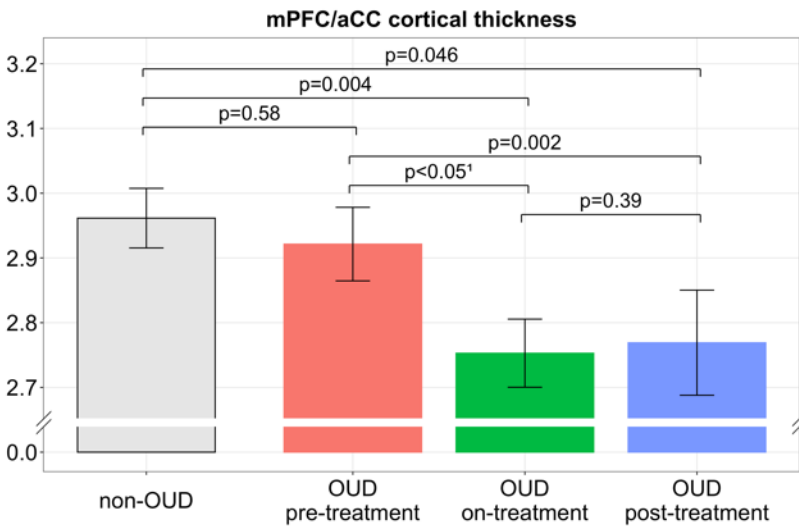

9 **Figure S2.** mPFC/aCC cortical thickness of the OUD individuals was higher at pre-treatment (N=47) than at on-treatment  
10 (N=47) and post-treatment (N=25), but the on-treatment and post-treatment sessions did not significantly differ. mPFC/aCC  
11 cortical thickness of the non-OD individuals (N=56) was comparable to that of the OUD individuals at pre-treatment and  
12 was higher than that of the OUD individuals at on-treatment and post-treatment. **Abbreviation:** OUD, opioid use disorder;  
13 mPFC, medial prefrontal cortex; aCC, anterior cingulate cortex. Error bars represent standard errors of the means. <sup>1</sup> The  
14 comparison between the pre-treatment and on-treatment sessions was performed in the whole-brain analysis at corrected  
15 p<0.05 using the threshold-free cluster enhancement algorithm.  
16

17  
18

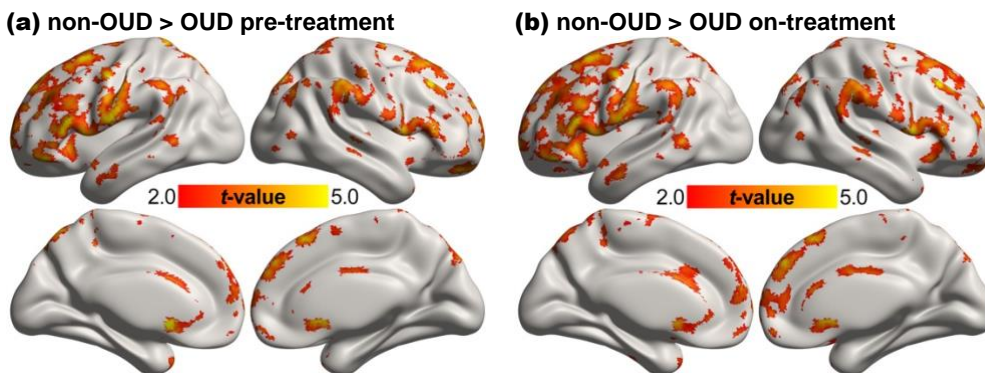

19 **Figure S3.** Significant higher cortical thickness in the non-OD individuals than the OUD individuals at pre-treatment (a) and  
20 on-treatment (b) revealed by whole-brain two-sample t-test, thresholded at corrected p<0.025. **Abbreviation:** OUD, opioid  
21 use disorder.
